# Supplementary material for: Novel mixed matrix membranes with indium-based 2D and 3D MOFs as fillers and polysulfone for CO2/CH4 mixed gas separation
Source: Royal Society of Chemistry journal article supplement (doi:10.1039/d4ra08557d), 2025-01-01
Supplement: d4ra08557d1.pdf [file d4ra08557d1.pdf]

Electronic Supporting Information

**Novel mixed matrix membranes with Indium based 2D and 3D MOFs as fillers and polysulfone for CO<sub>2</sub>/CH<sub>4</sub> mixed gas separation**

**Aditya Jonnalagedda, Bhanu Vardhan Reddy Kuncharam\***

Department of Chemical Engineering,  
Birla Institute of Technology & Science, Pilani, Pilani Campus  
Rajasthan, 333031, India

\*Corresponding author:

Prof. Bhanu Vardhan Reddy Kuncharam,  
Associate Professor, Department of Chemical Engineering,  
Birla Institute of Technology and Science, Pilani, Pilani, Rajasthan, India  
Phone: +91-1596255839  
Email: [bhanu.vardhan@pilani.bits-pilani.ac.in](mailto:bhanu.vardhan@pilani.bits-pilani.ac.in)

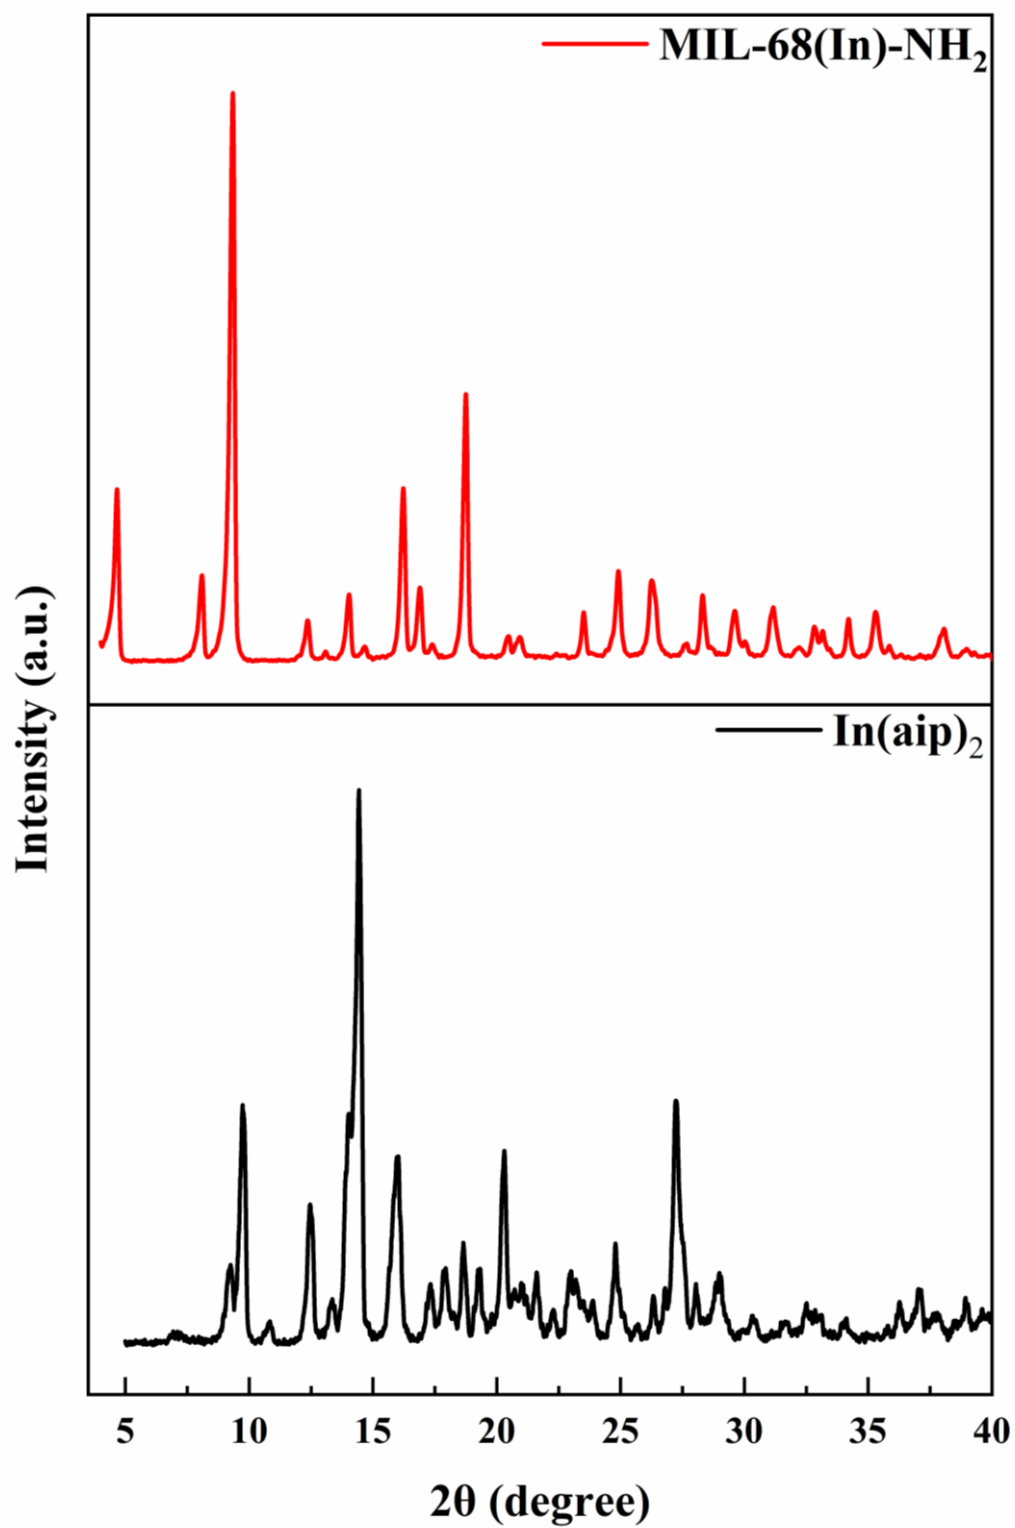

Figure S1. XRD of a) MIL-68(In)-NH<sub>2</sub>, b) In(aip)<sub>2</sub> for stability.

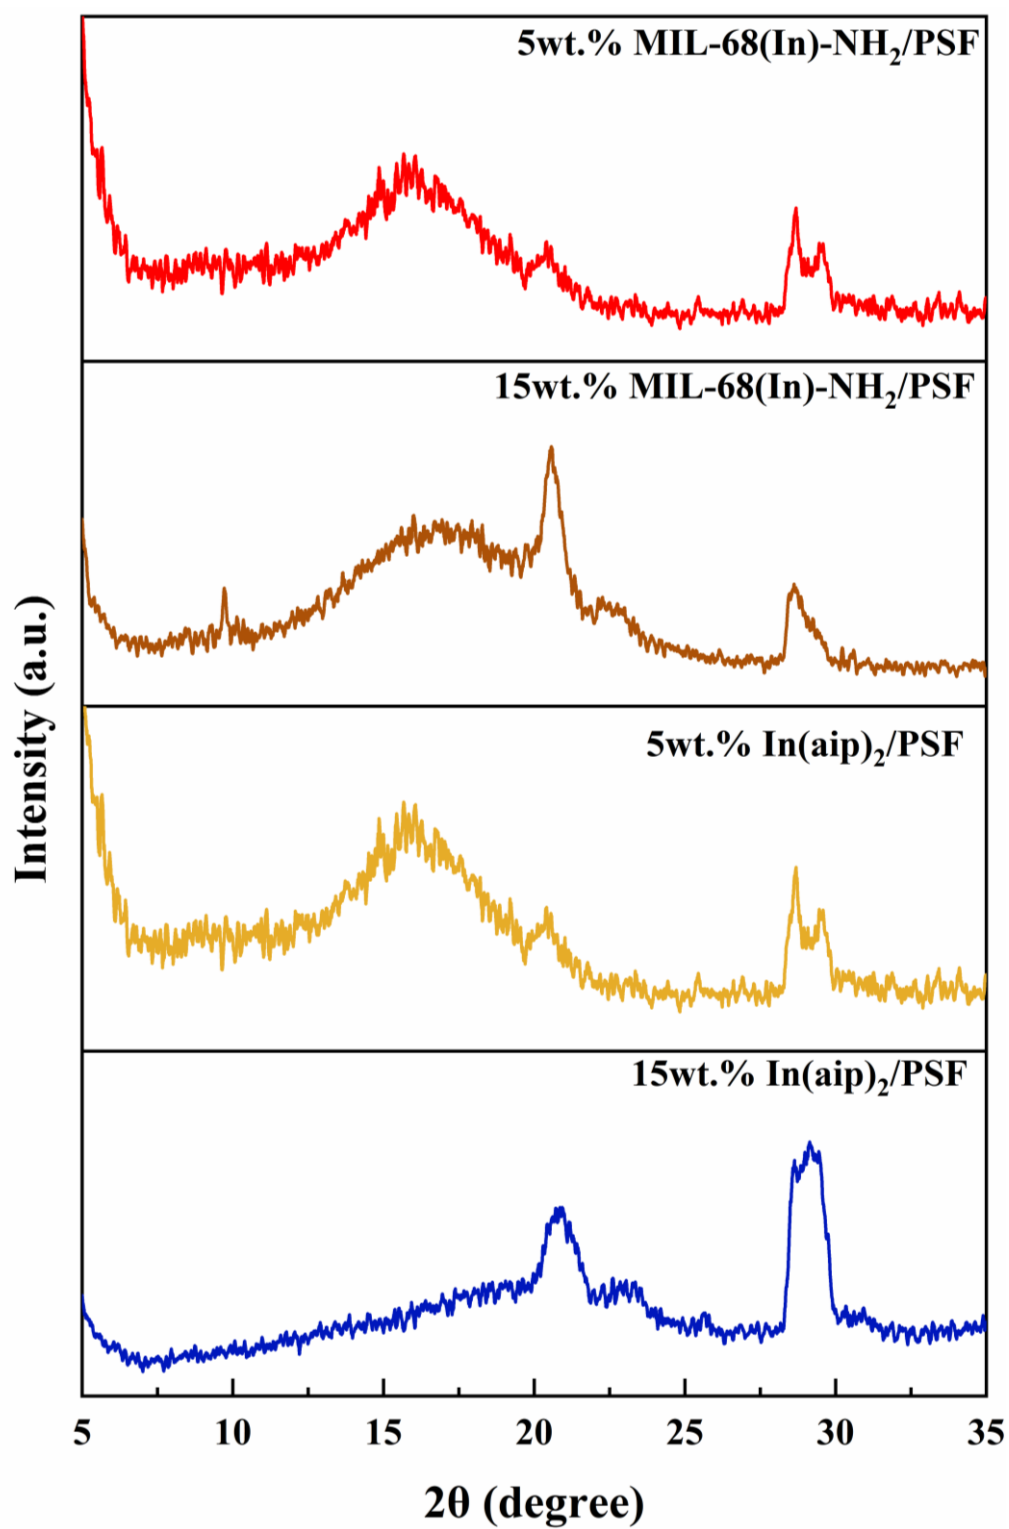

Figure S2. XRD of MMMs

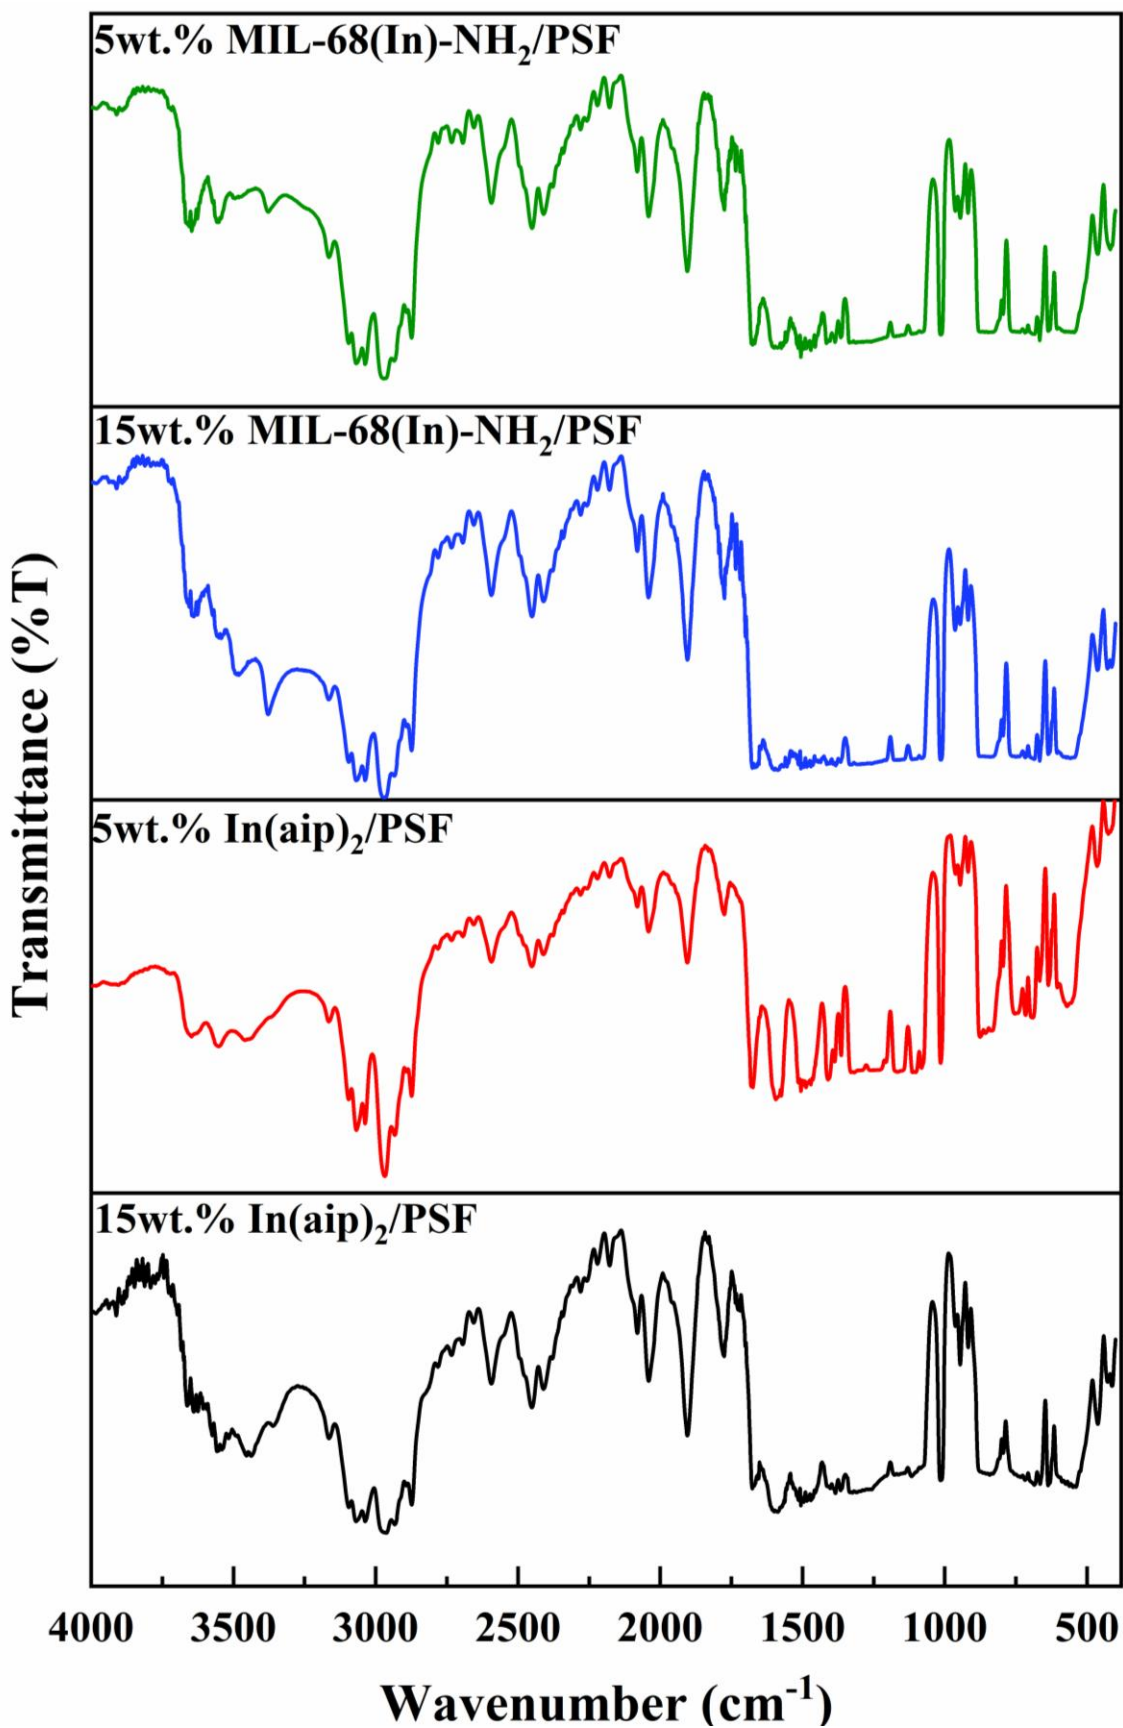

Figure S3. FTIR of MMMs

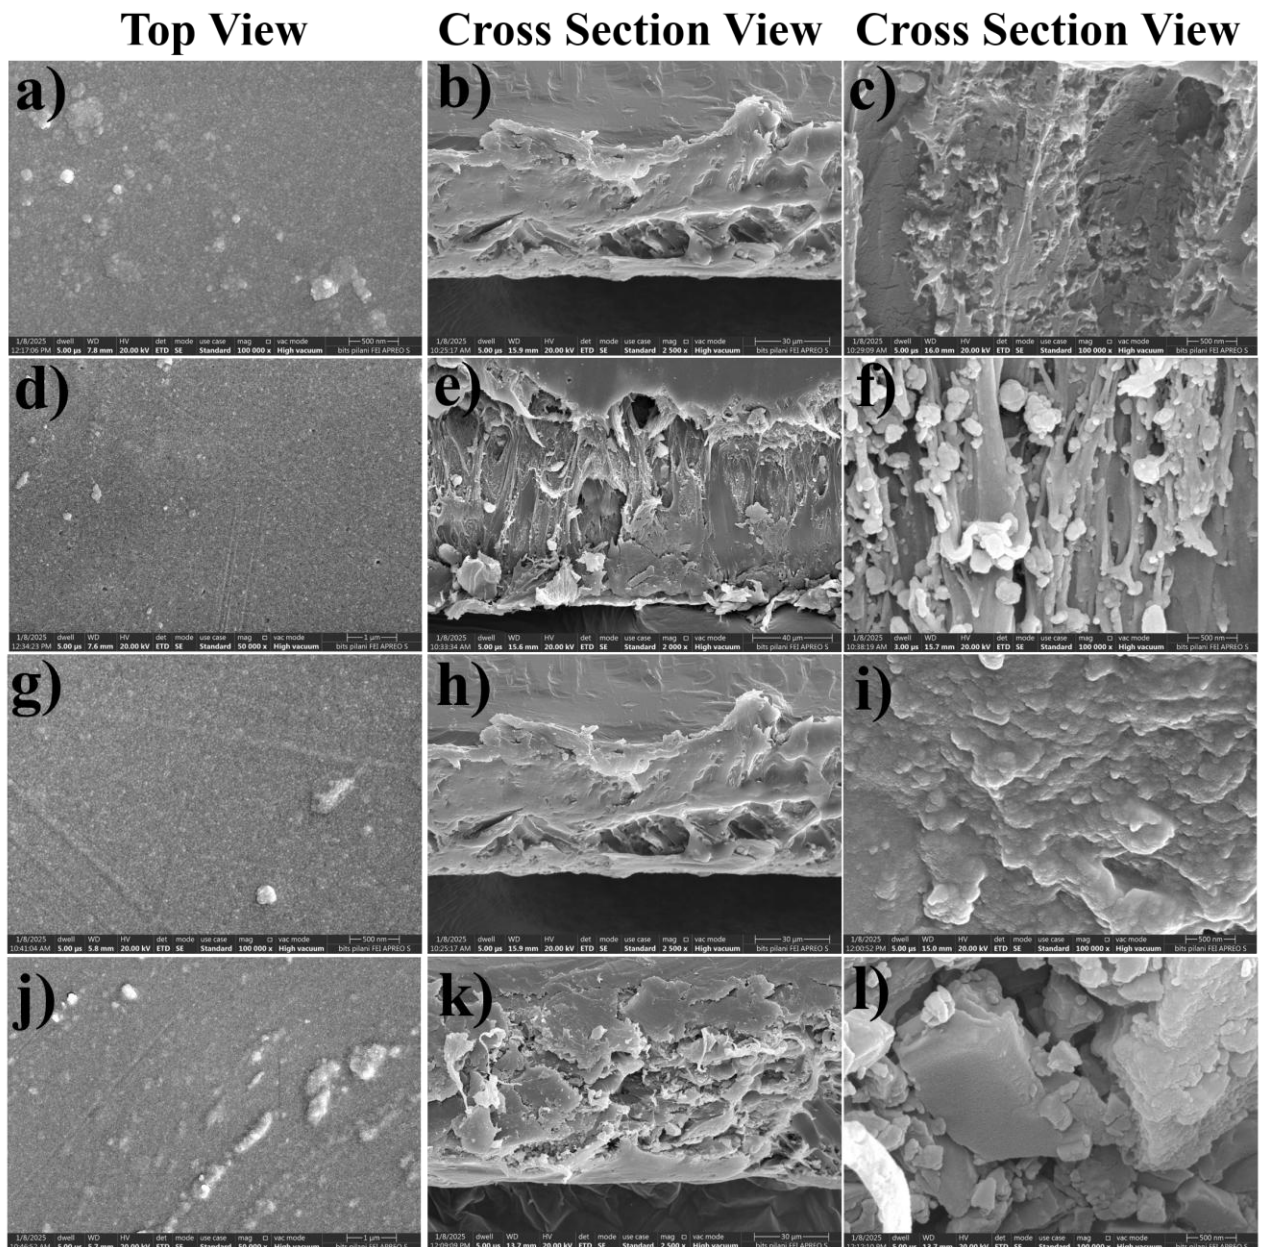

Figure S4. FESEM images of MMMs (a, b, c) 5wt.% MIL-68-NH<sub>2</sub>/PSF, (d, e, f) 15wt.% MIL-68-NH<sub>2</sub>/PSF, (g, h, i) 5wt.% In(aip)<sub>2</sub>/PSF MMM, (j, k, l) 15wt.% In(aip)<sub>2</sub>/PSF MMM.

Table S1. T<sub>g</sub> of MMMs

| MMM                                    | Glass Transition Temperature- T <sub>g</sub> (°C) |
|----------------------------------------|---------------------------------------------------|
| 5wt.% MIL-68(In)-NH <sub>2</sub> /PSF  | 180.5 ± 0.7                                       |
| 15wt.% MIL-68(In)-NH <sub>2</sub> /PSF | 182.6 ± 0.3                                       |
| 5wt.% In(aip) <sub>2</sub> /PSF        | 179.8 ± 0.6                                       |
| 15wt.% In(aip) <sub>2</sub> /PSF       | 182.4 ± 0.5                                       |

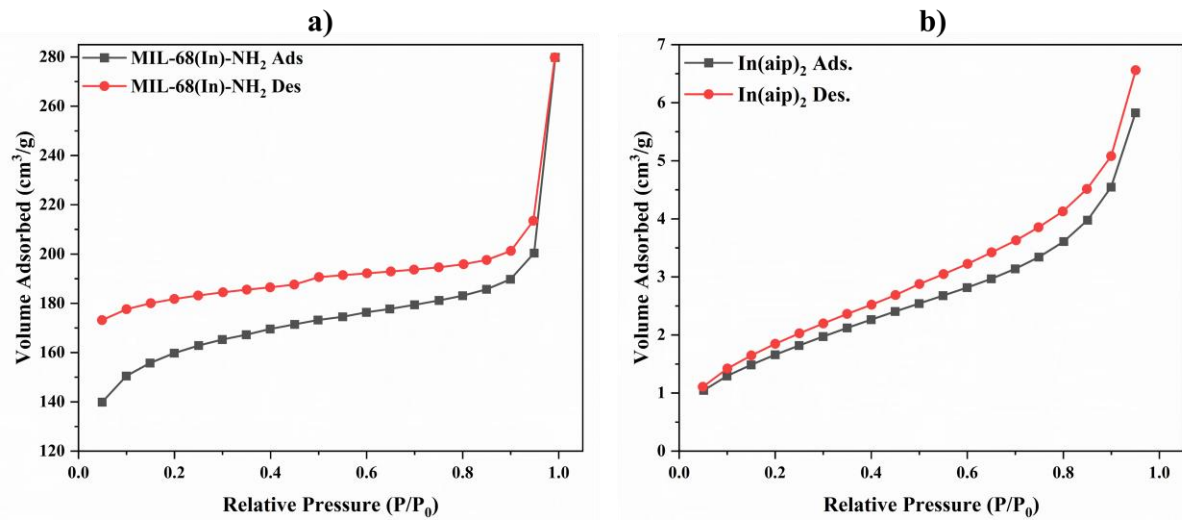

Figure S5.  $N_2$  adsorption and desorption isotherms of a) MIL-68(In)-NH<sub>2</sub> and b) In(aip)<sub>2</sub> samples at 77 K.

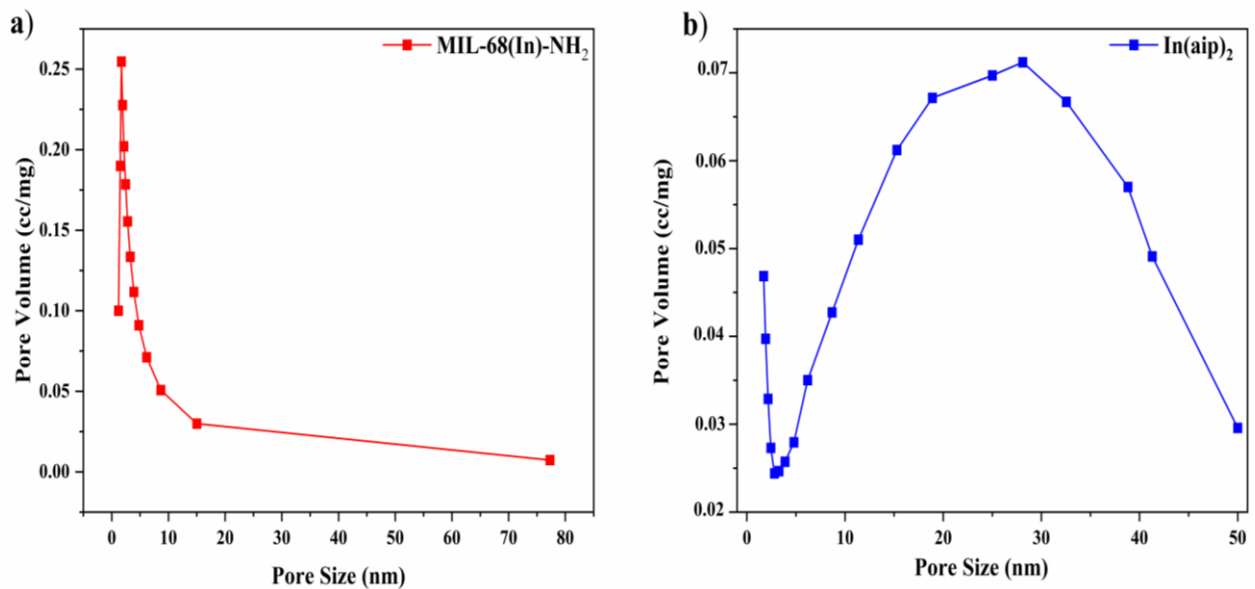

Figure S6. Pore distribution curves of a) MIL-68(In)-NH<sub>2</sub>, b) In(aip)<sub>2</sub>
